# Supplementary material for: Iridal-Type Triterpenoids Displaying Human Neutrophil Elastase Inhibition and Anti-Inflammatory Effects from Belamcanda chinensis
Source: MDPI journal article supplement (doi:10.3390/molecules26216602), 2021-10-31
Supplement: s1 [file s1]

# Supplementary material

## Iridal-type triterpenoids displaying human neutrophil elastase inhibition and anti-inflammatory effects from *Belamcanda chinensis*

### **► Characterization Data**

- Figure. S1–7: NMR and HRESIMS data of compound **1**
- Figure. S8–14: NMR and HRESIMS data of compound **2**
- Figure. S15–21: NMR and HRESIMS data of compound **3**
- Table S1: Primer sequences used for RT- PCR

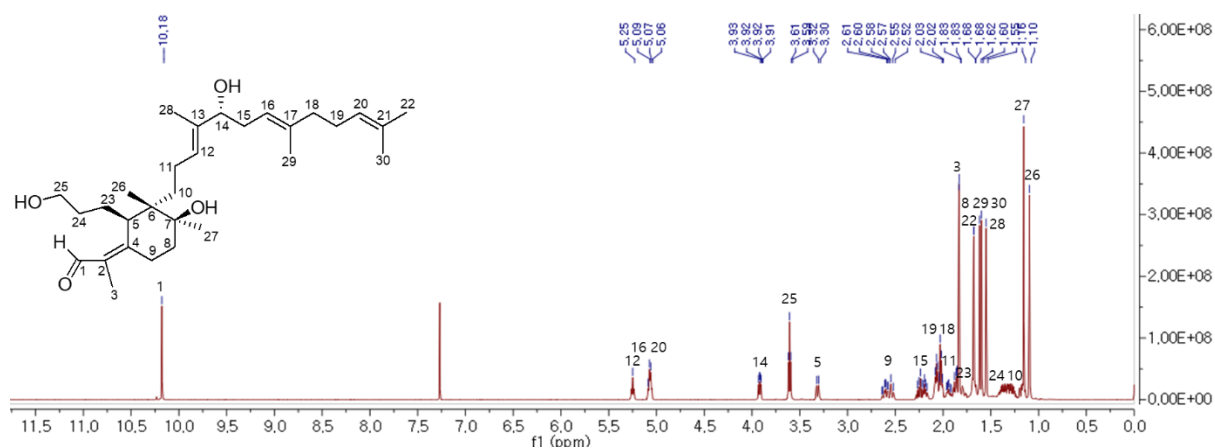

**Figure. S1.**  $^1\text{H}$ -NMR spectrum of compound **1** (500 MHz, chloroform-*d*)

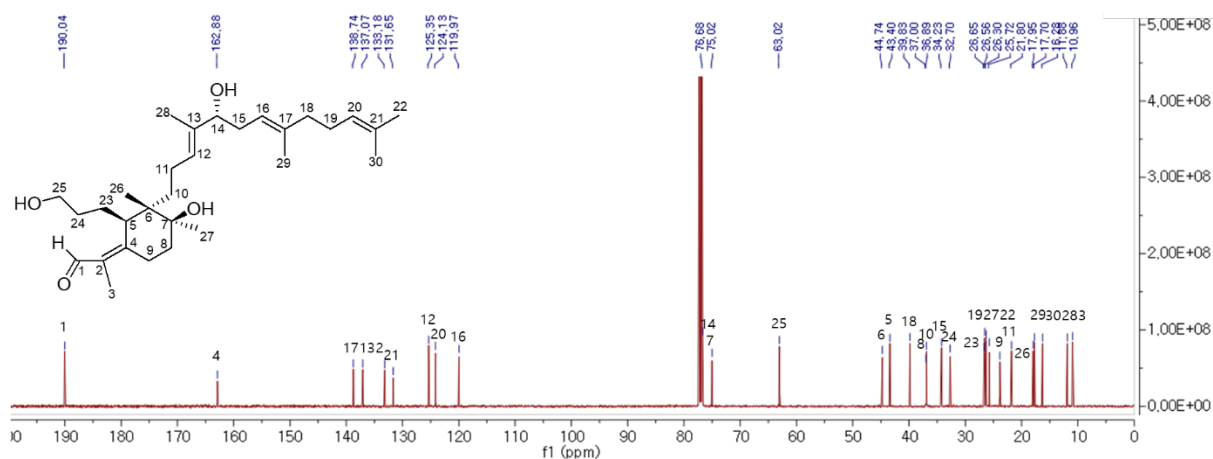

**Figure. S2.**  $^{13}\text{C}$ -NMR spectrum of compound **1** (500 MHz, chloroform-*d*)

## DEPT 90

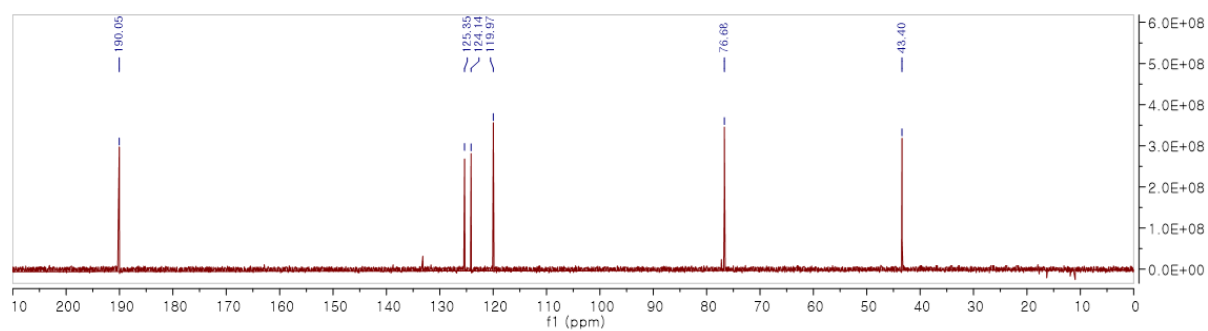

## DEPT 135

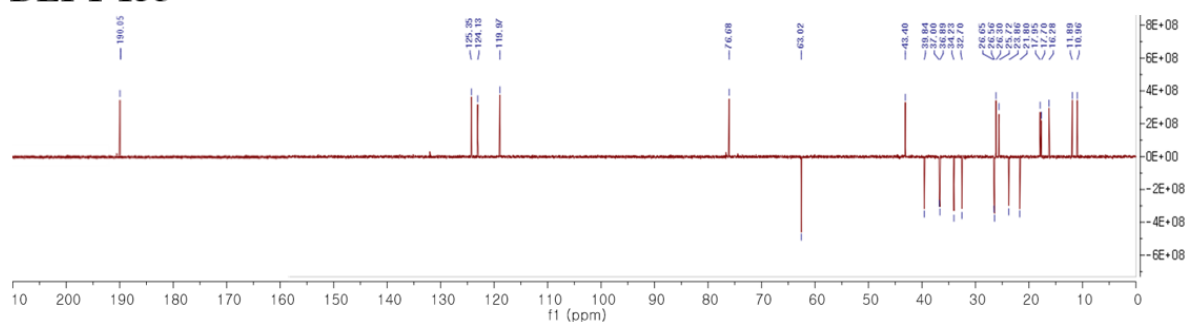

**Figure. S3.** DEPT-90 and -135 spectra of compound 1.

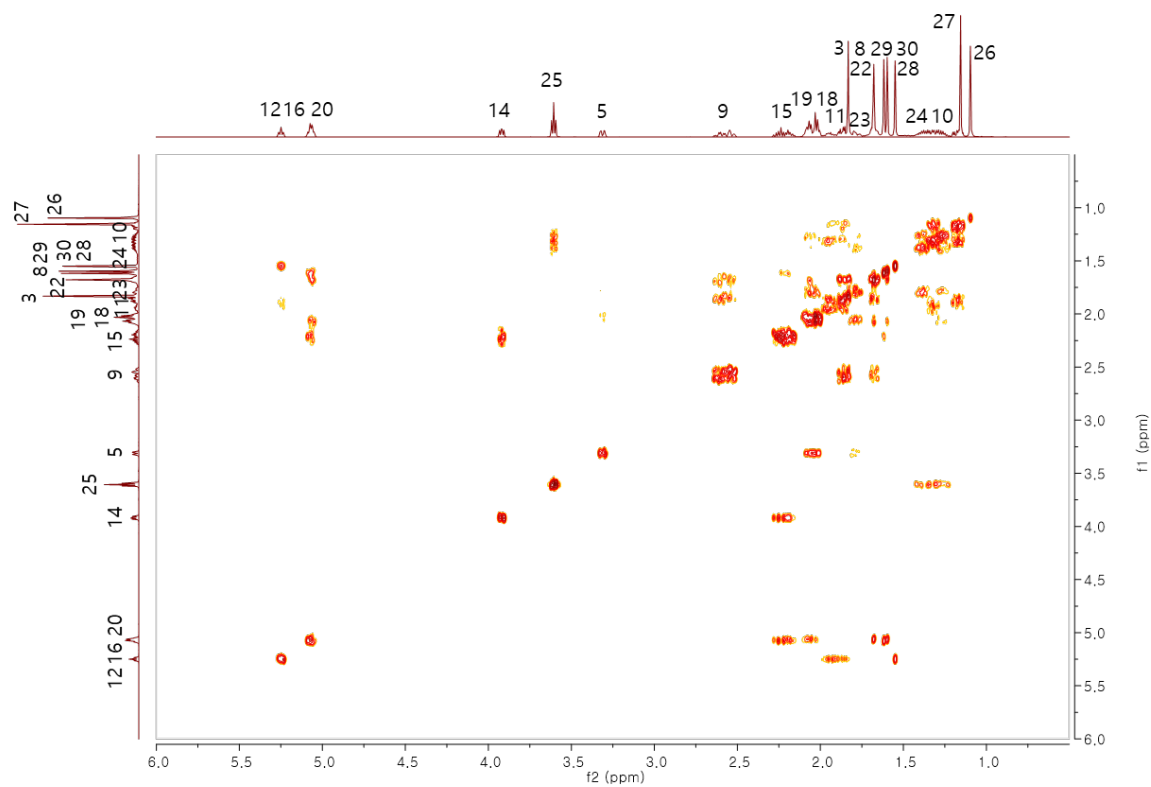

**Figure. S4.** COSY spectrum of compound 1.

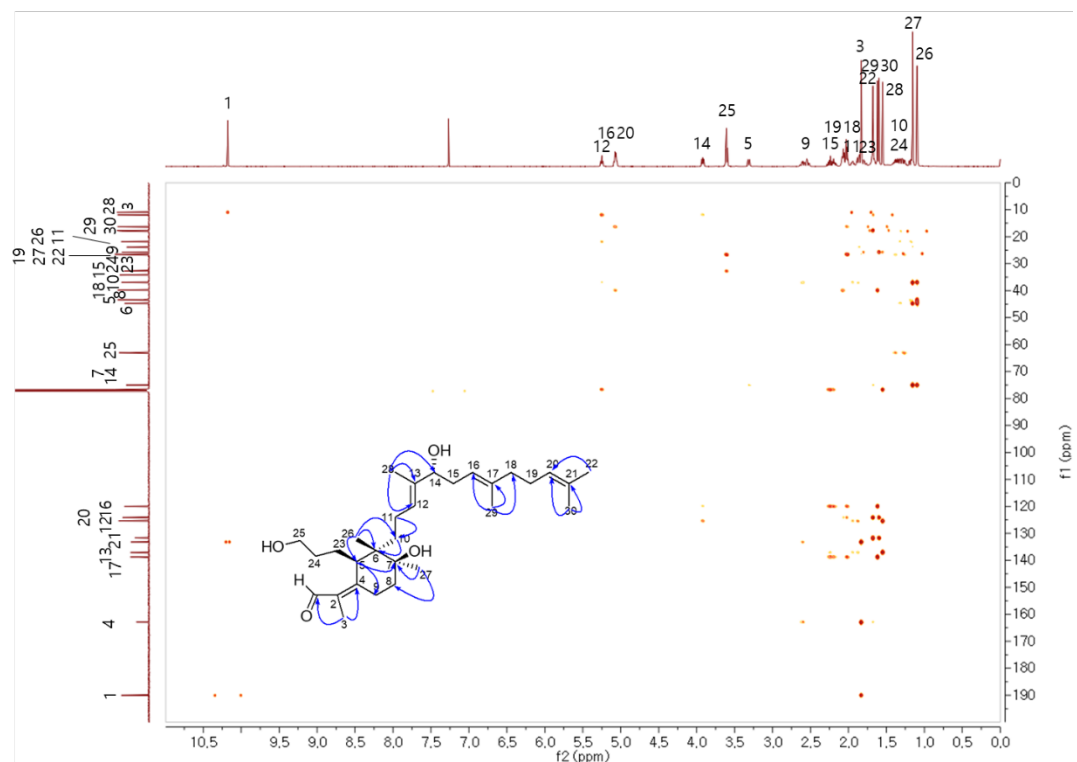

**Figure. S5.** HMBC spectrum of compound 1.

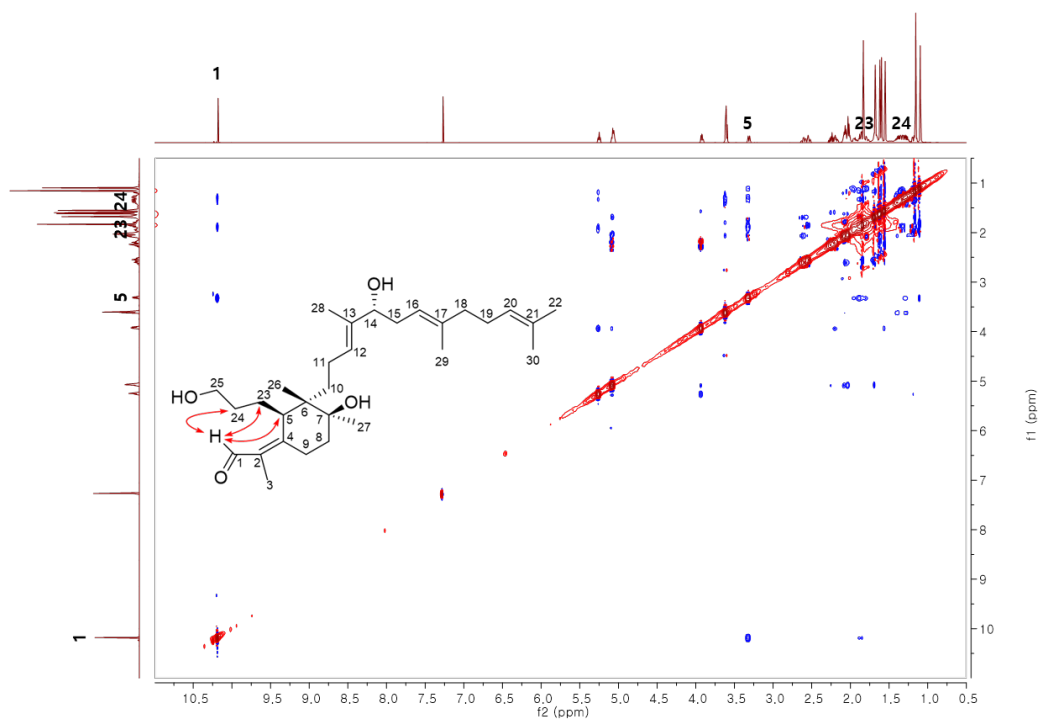

**Figure. S6.** NOESY spectrum of compound 1.

Item name: 10-30EV  
Item description:

Channel name: Low energy : Time 5.6681 +/- 0.0171 minutes

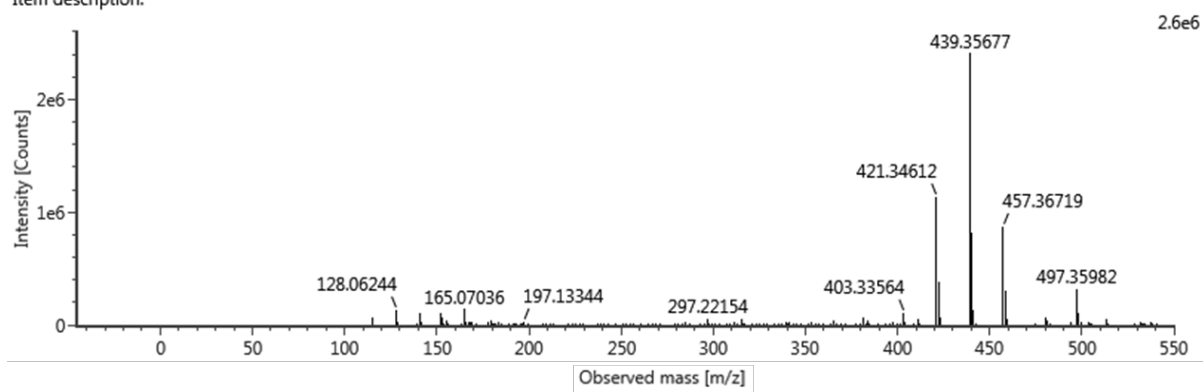

| Component name | Formula                                        | Neutral mass (Da) | Observed neutral mass (Da) | Observed m/z | Mass error (mDa) | Mass error (ppm) | Observed RT (min) | Adducts |
|----------------|------------------------------------------------|-------------------|----------------------------|--------------|------------------|------------------|-------------------|---------|
| Compound 1     | C <sub>30</sub> H <sub>50</sub> O <sub>4</sub> | 474.37091         | 474.3706                   | 497.3598     | -0.3             | -0.6             | 5.67              | +Na     |

**Figure. S7.** LC-Q-TOF/MS data of compound 1.

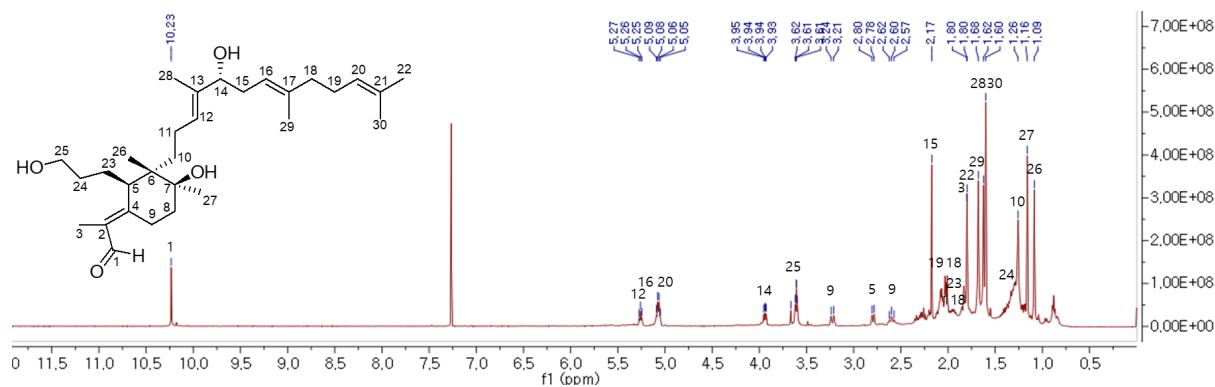

**Figure. S8.**  $^1\text{H}$ -NMR spectrum of compound **2** (500 MHz, chloroform-*d*)

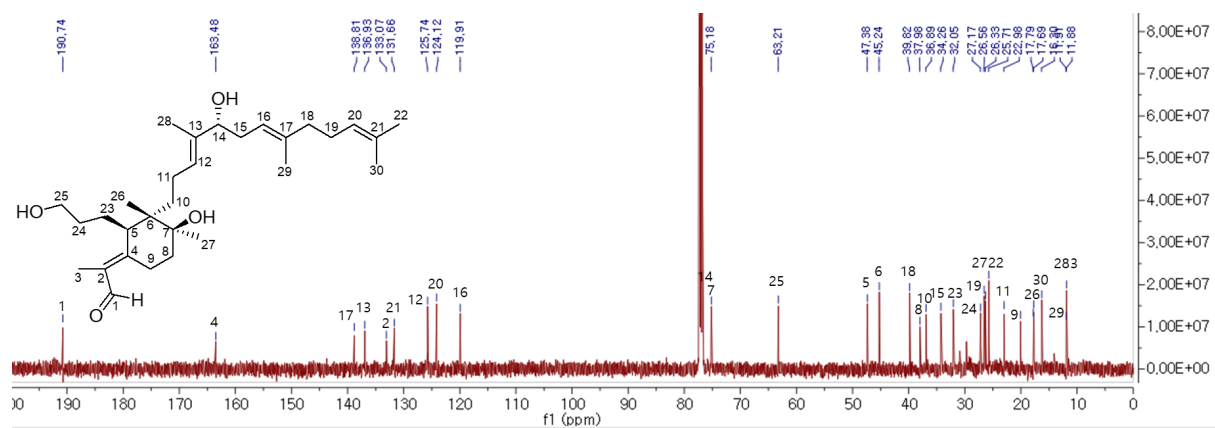

**Figure. S9.**  $^{13}\text{C}$ -NMR spectrum of compound **2** (500 MHz, chloroform-*d*)

## DEPT 90

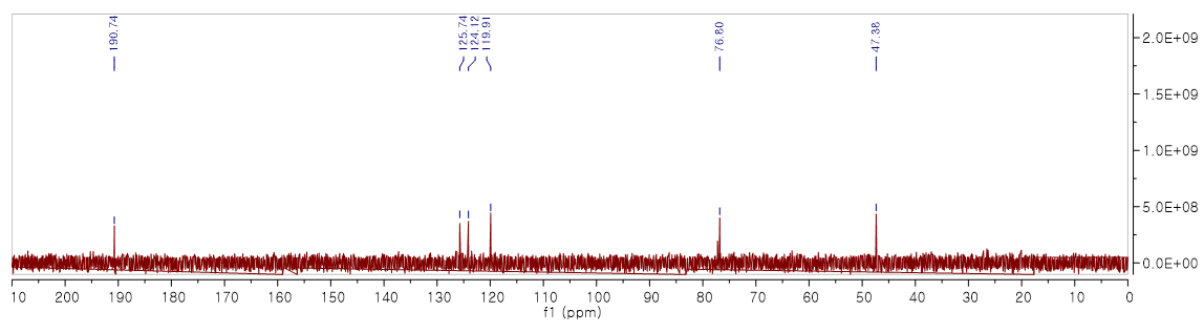

## DEPT 135

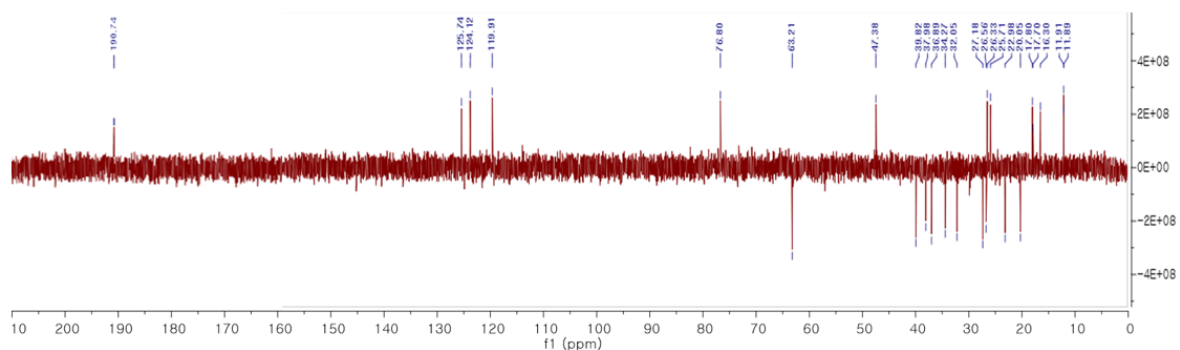

Figure. S10. DEPT-90 and -135 spectra of compound 2.

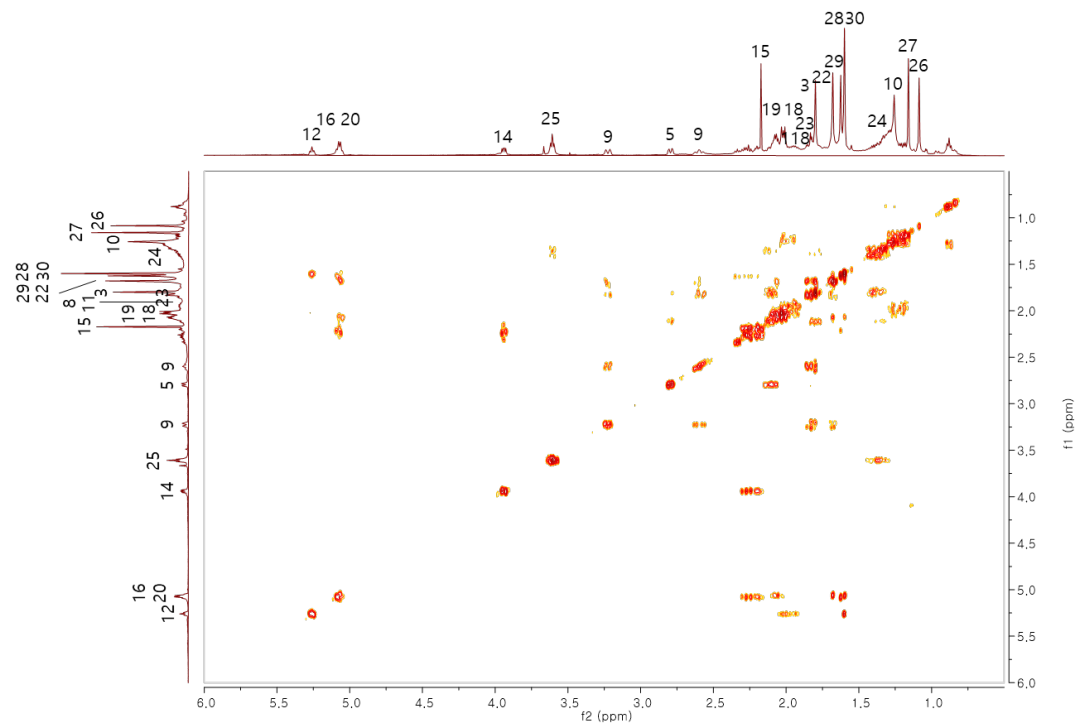

Figure. S11. COSY spectrum of compound 2.

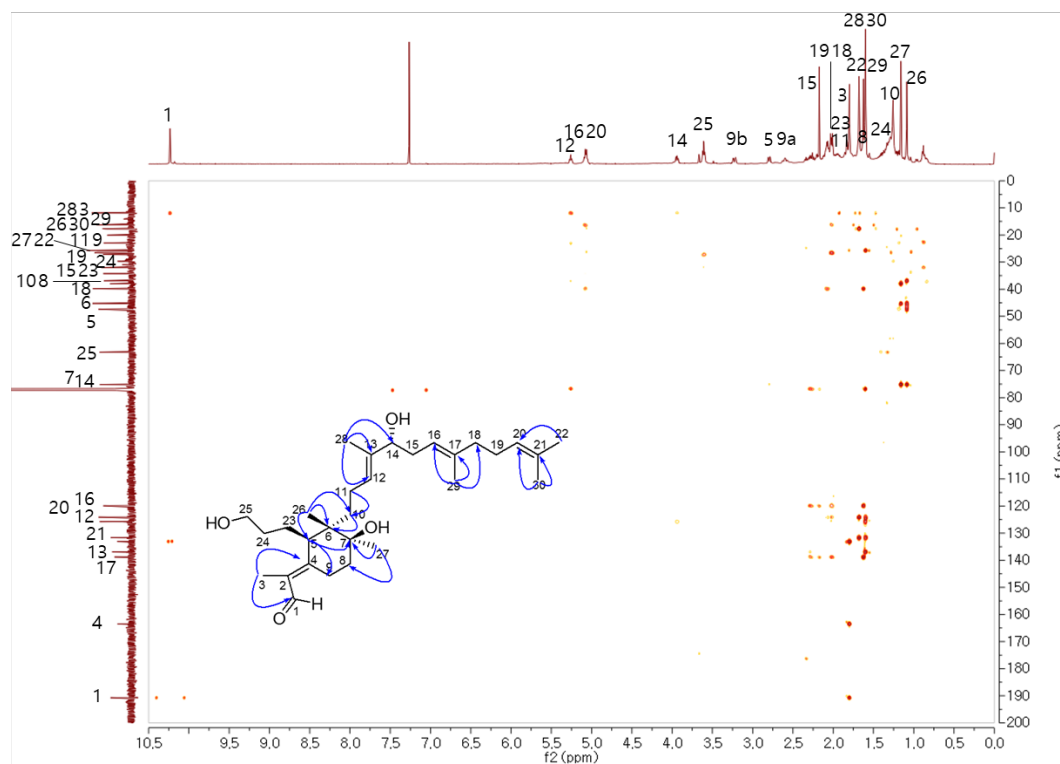

**Figure. S12.** HMBC spectrum of compound 2.

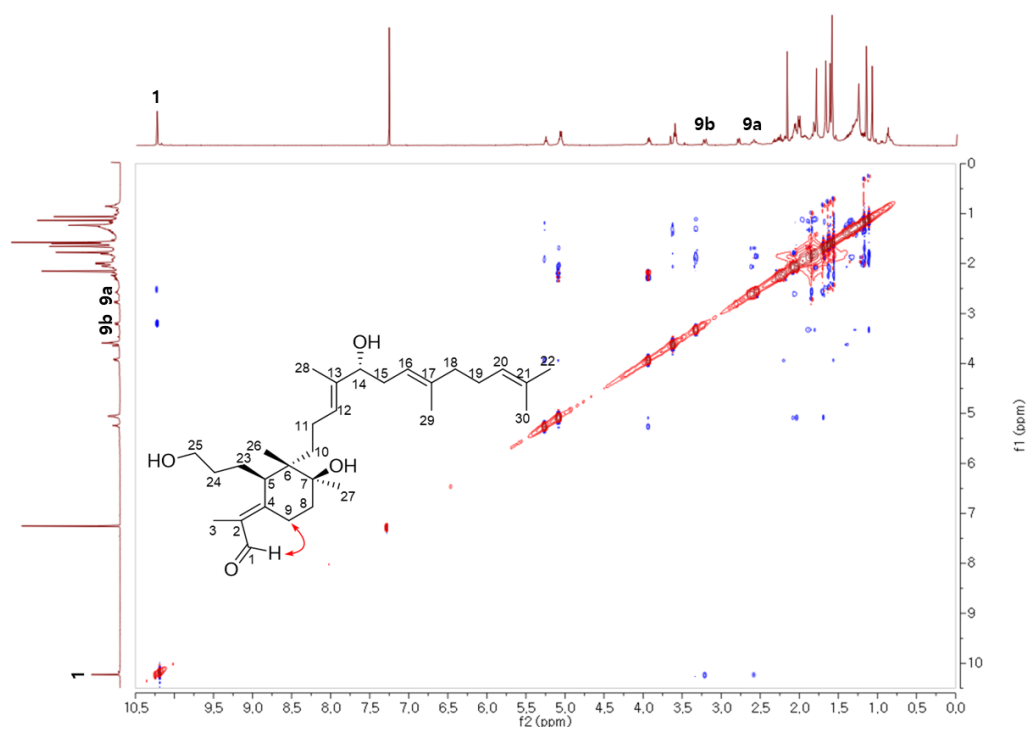

**Figure. S13.** NOESY spectrum of compound 2.

Item name: 10-30EV  
Item description:

Channel name: Low energy : Time 5.5892 +/- 0.0171 minutes

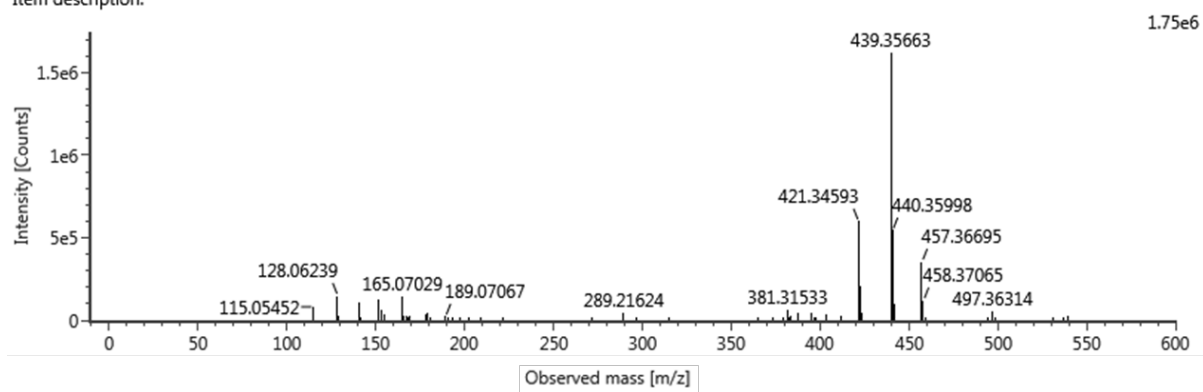

| Component name | Formula                                        | Neutral mass (Da) | Observed neutral mass (Da) | Observed m/z | Mass error (mDa) | Mass error (ppm) | Observed RT (min) | Adducts |
|----------------|------------------------------------------------|-------------------|----------------------------|--------------|------------------|------------------|-------------------|---------|
| Compound 2     | C <sub>30</sub> H <sub>50</sub> O <sub>4</sub> | 474.37091         | 474.3739                   | 497.3631     | 3.1              | 6.3              | 5.59              | +Na     |

**Figure. S14.** LC-Q-TOF/MS data of compound 2.

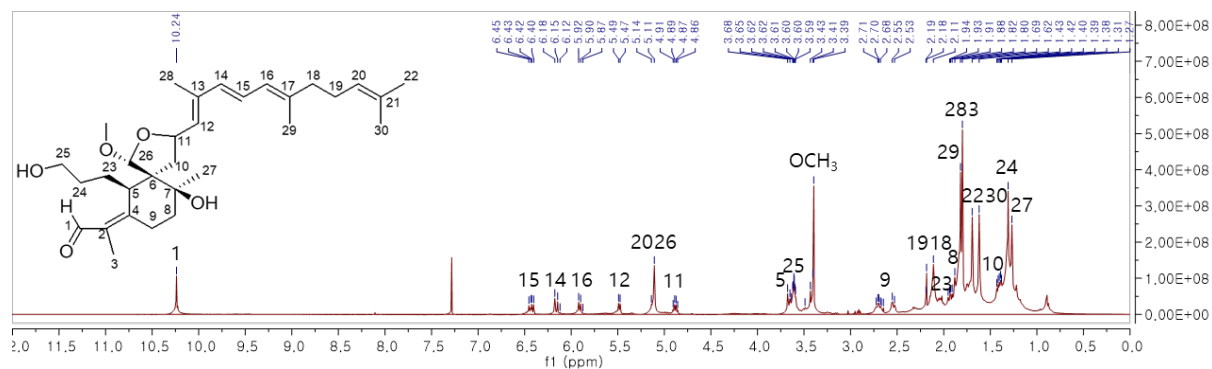

**Figure. S15.**  $^1\text{H}$ -NMR spectrum of compound **3** (500 MHz, chloroform-*d*).

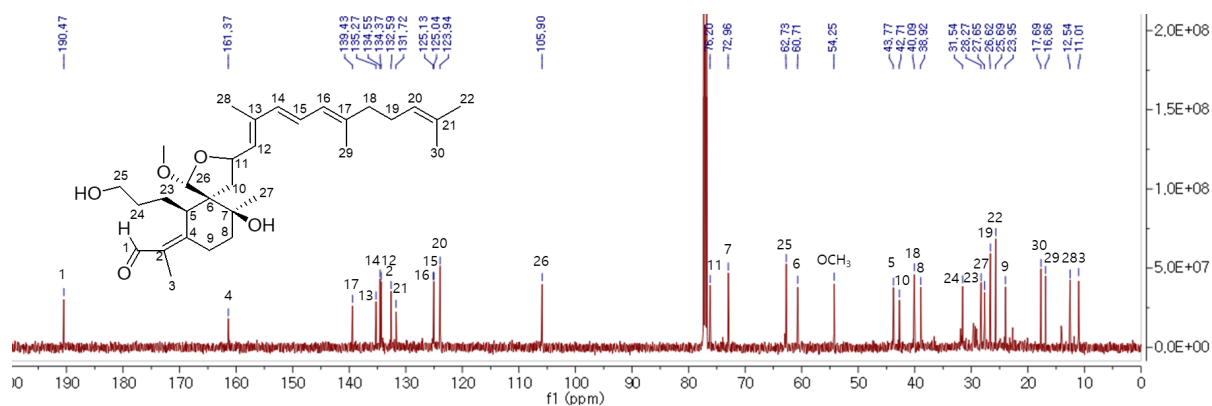

**Figure. S16.**  $^{13}\text{C}$ -NMR spectrum of compound **3** (500 MHz, chloroform-*d*).

# DEPT 90

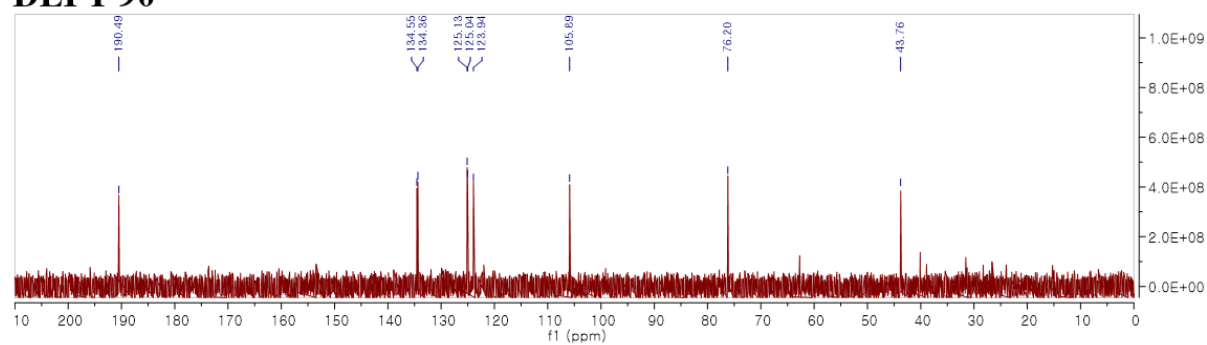

# DEPT 135

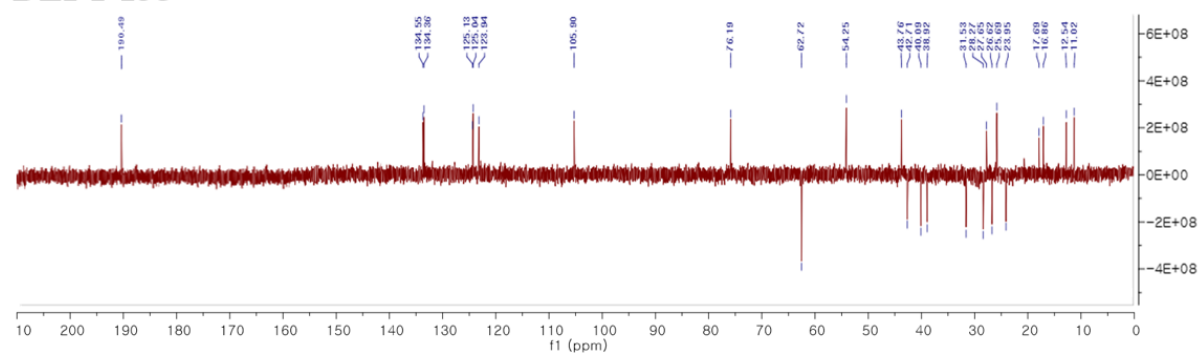

**Figure. S17.** DEPT-90 and -135 spectra of compound **3**.

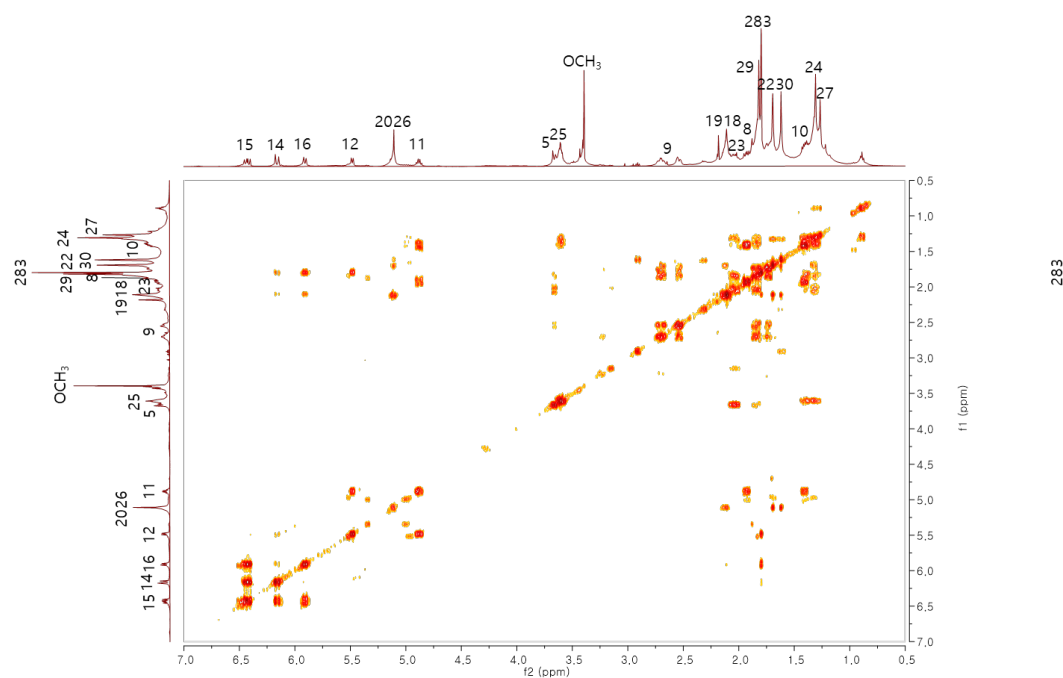

**Figure. S18.** COSY spectrum of compound **3**.

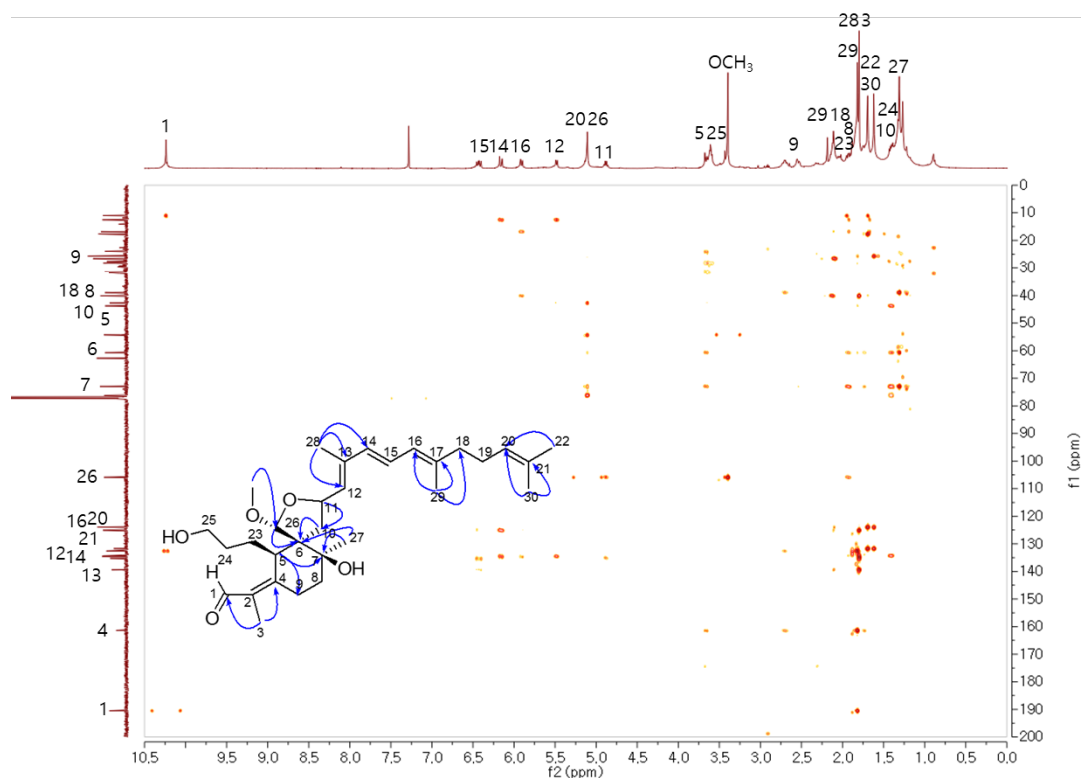

**Figure. S19.** HMBC spectrum of compound **3**.

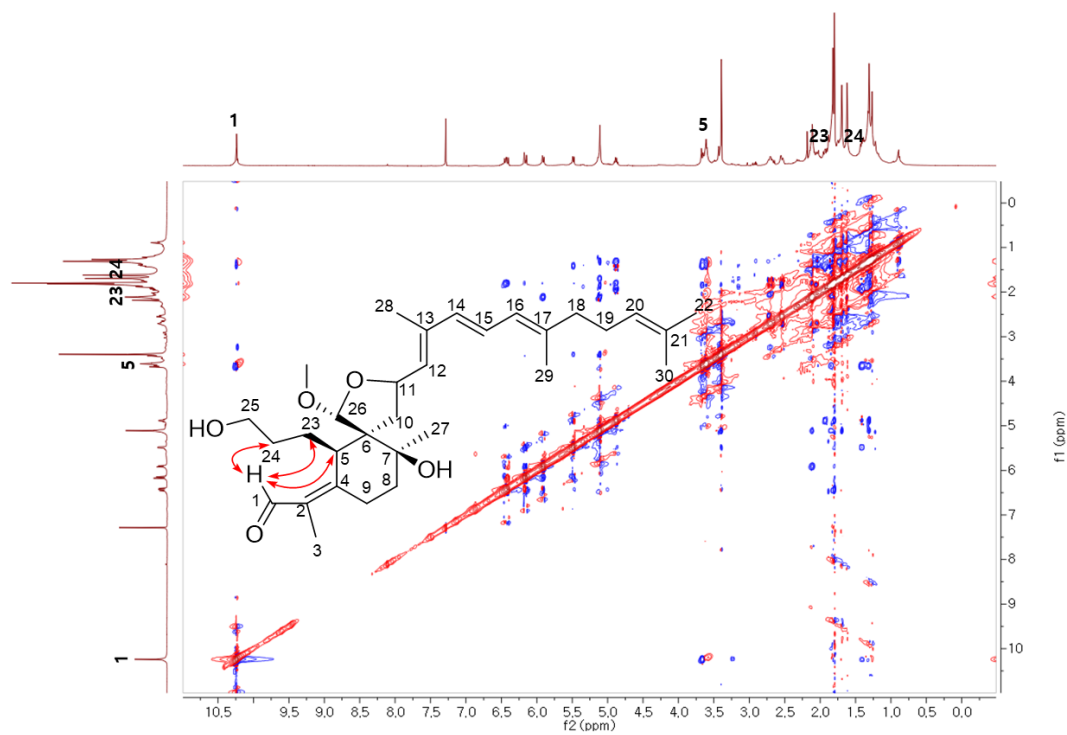

**Figure. S20.** NOESY spectrum of compound **3**.

Item name: 10-30EV  
Item description:

Channel name: Low energy : Time 6.4106 +/- 0.0171 minutes

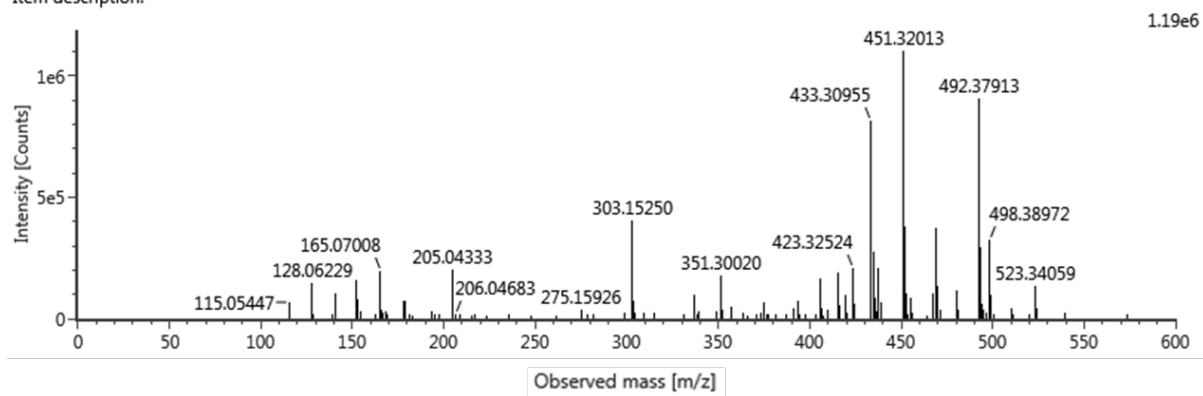

| Component name | Formula                                        | Neutral mass (Da) | Observed neutral mass (Da) | Observed m/z | Mass error (mDa) | Mass error (ppm) | Observed RT (min) | Adducts |
|----------------|------------------------------------------------|-------------------|----------------------------|--------------|------------------|------------------|-------------------|---------|
| Compound 4     | C <sub>31</sub> H <sub>48</sub> O <sub>5</sub> | 500.35017         | 500.3514                   | 523.3406     | -0.3             | 0.6              | 6.41              | +Na     |

**Figure. S21.** LC-Q-TOF/MS data of compound 3.

**Table S1.** Primer sequences used for RT- PCR

| Gene<br>Name | GenBank<br>Acc. No. | Primer Sequences (5'-3')                                              | Expected<br>Size (bp) |
|--------------|---------------------|-----------------------------------------------------------------------|-----------------------|
| <i>Il1b</i>  | NM_008361.4         | Sense: GTTGACGGACCCCAAAAGAT<br>Antisense: TCGTTGCTTGGTTCTCCTTG        | 440                   |
| <i>Nos2</i>  | <u>NM_012611.3</u>  | Sense: CTCCATGACTCTCAGCACAGAG<br>Antisense: GCACCGAAGATATCCTCATGAT    | 401                   |
| <i>Tnf</i>   | NM_013693.3         | Sense: CAGCCTCTTCTCTTCTCATTCCTGC<br>Antisense: TGTCCCTTGAAGAGAGAACCTG | 339                   |
| <i>Gapdh</i> | GU214026            | Sense: CTA AAG GGC ATC CTG GGC<br>Antisense: TTA CTC CTT GGA GGC CAT  | 201                   |
